# Supplementary material for: Solvent-free synthesis of a microporous metal–organic framework
Source: Royal Society of Chemistry journal article supplement (doi:10.1039/b513750k), 2006-01-01
Supplement: b513750k.pdf [file b513750k.pdf]

## Solvent-free synthesis of a microporous metal-organic framework

Anne Pichon, Ana Lazuen and Stuart L. James\*

*School of Chemistry, The Queen's University of Belfast, David Keir Building, Stranmillis Road, Belfast, Northern Ireland BT9 5AG, UK. Email: [s.james@qub.ac.uk](mailto:s.james@qub.ac.uk)*

Supplementary information

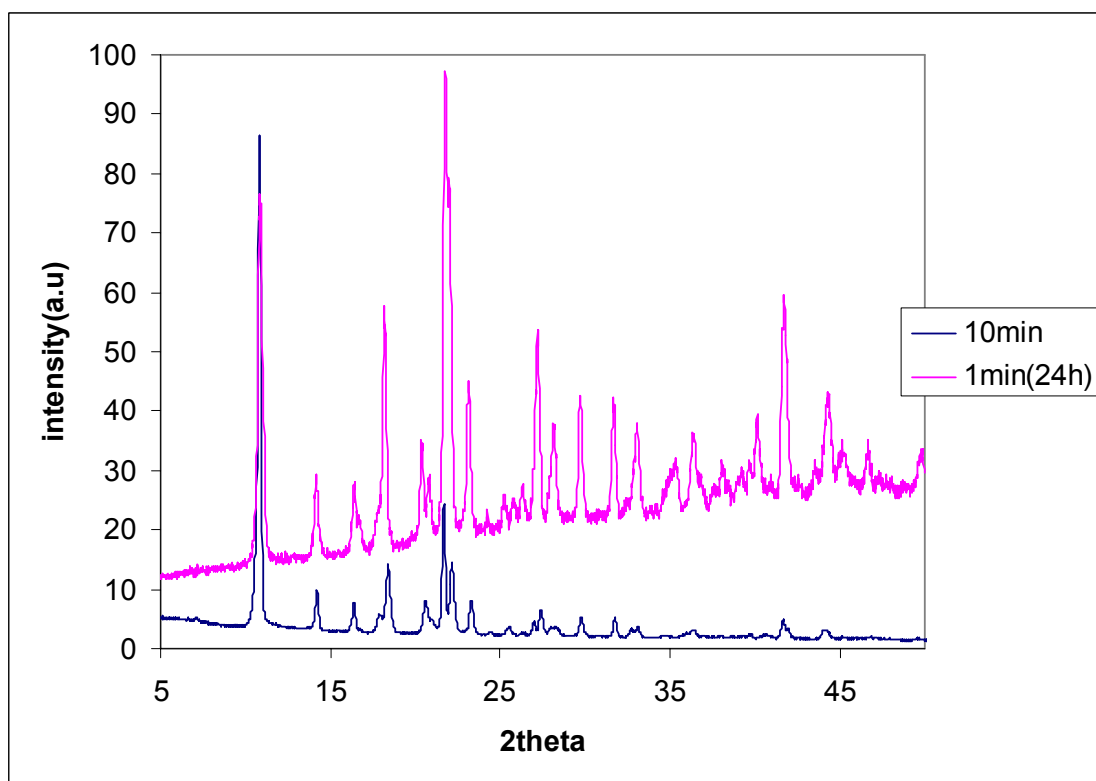

S1 Comparison of XRPD patterns from samples of material 1 prepared by 1 and 10 minutes grinding. The 1 minute sample had been left to stand for 24h before obtaining the XRPD pattern.
